# Supplementary material for: A linked land-sea modeling framework to inform ridge-to-reef management in high oceanic islands
Source: PLOS journal article supplement (doi:10.1371/journal.pone.0193230), 2018-03-14
Supplement: S1 (10.1371/journal.pone.0193230.s001) [file journal.pone.0193230.s001]

"I request permission for the open-access journal PLOS ONE to publish *the wave model image* under the Creative Commons Attribution License (CCAL) CC BY 4.0 (<http://creativecommons.org/licenses/by/4.0/>). Please be aware that this license allows unrestricted use and distribution, even commercially, by third parties. Please reply and provide explicit written permission to publish *the wave model image* under a CC BY license."

Permission granted to use the wave model image.

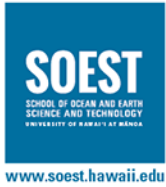

**Charles "Chip" Fletcher**

Associate Dean for Academic Affairs  
Professor of Geology and Geophysics

office 808.956.2582 cell 808.294.0386  
[fletcher@soest.hawaii.edu](mailto:fletcher@soest.hawaii.edu)

1680 East-West Road, POST 802  
Honolulu, Hawai'i USA 96822  
[www.soest.hawaii.edu/coasts/](http://www.soest.hawaii.edu/coasts/)
